# Supplementary material for: Long-term psychosocial outcomes of low-dose CT screening: results of the UK Lung Cancer Screening randomised controlled trial
Source: PubMed Central journal article supplement (PMC5099188; doi:10.1136/thoraxjnl-2016-208283), 2016-07-28
Supplement: thoraxjnl-2016-208283supp_table1.pdf [file thoraxjnl-2016-208283supp_table1.pdf]

**Supplementary Table I. T<sub>1</sub> sample baseline characteristics by trial allocation**

|                                                    |                             | <b>Intervention<br/>(n=1653)<sup>‡</sup><br/>n (%) or mean (SD)</b> | <b>Control<br/>(n=1579)<sup>‡</sup><br/>n (%) or mean (SD)</b> | <b>Test<br/>statistic<br/>(p value)</b> |
|----------------------------------------------------|-----------------------------|---------------------------------------------------------------------|----------------------------------------------------------------|-----------------------------------------|
| <b>Site</b>                                        | Liverpool                   | 819 (50)                                                            | 766 (49)                                                       | p=0.56                                  |
|                                                    | Cambridge                   | 834 (51)                                                            | 813 (52)                                                       |                                         |
| <b>Age (years)</b>                                 |                             | 67.71 (3.94)                                                        | 67.75 (4.02)                                                   | p=0.77                                  |
| <b>Gender</b>                                      | Male                        | 1253 (76)                                                           | 1193 (76)                                                      | p=0.87                                  |
|                                                    | Female                      | 400 (24)                                                            | 386 (24)                                                       |                                         |
| <b>Education<sup>¶</sup></b>                       | Up to GCSE/O level          | 516 (44)                                                            | 491 (43)                                                       | p=0.53                                  |
|                                                    | Beyond GCSE/O level         | 654 (56)                                                            | 656 (57)                                                       |                                         |
| <b>Ethnicity</b>                                   | White                       | 1632 (99)                                                           | 1558 (99)                                                      | ^                                       |
|                                                    | Non-white                   | 13 (1)                                                              | 13 (1)                                                         |                                         |
| <b>Marital group</b>                               | Married /cohabiting         | 1239 (75)                                                           | 1171 (74)                                                      | p=0.57                                  |
|                                                    | Not married/cohabiting      | 409 (25)                                                            | 405 (26)                                                       |                                         |
| <b>IMD</b>                                         | Quintile 1 (most deprived)  | 447 (27)                                                            | 396 (25)                                                       | p=0.51                                  |
|                                                    | Quintile 2                  | 193 (12)                                                            | 174 (11)                                                       |                                         |
|                                                    | Quintile 3                  | 292 (18)                                                            | 282 (18)                                                       |                                         |
|                                                    | Quintile 4                  | 280 (17)                                                            | 298 (19)                                                       |                                         |
|                                                    | Quintile 5 (least deprived) | 441 (27)                                                            | 429 (27)                                                       |                                         |
| <b>Smoking status</b>                              | Current smoker              | 621 (38)                                                            | 573 (36)                                                       | p=0.44                                  |
|                                                    | Ex-smoker                   | 1031 (62)                                                           | 1006 (64)                                                      |                                         |
|                                                    | Never smoker                | 1 (<1)                                                              | 0 (0)                                                          | ^                                       |
| <b>Experience of lung cancer (T<sub>0</sub>)</b>   | No                          | 974 (59)                                                            | 896 (57)                                                       | p=0.20                                  |
|                                                    | Yes                         | 675 (41)                                                            | 680 (43)                                                       |                                         |
| <b>Cancer distress (T<sub>0</sub>)<sup>+</sup></b> |                             | 2.16 (0.28)<br><i>8.71</i>                                          | 2.15 (0.28)<br><i>8.60</i>                                     | p=0.21                                  |
| <b>Anxiety (T<sub>0</sub>)<sup>+</sup></b>         |                             | 1.53 (0.71)<br><i>3.63</i>                                          | 1.51 (0.71)<br><i>3.55</i>                                     | p=0.46                                  |
| <b>Depression (T<sub>0</sub>)<sup>+</sup></b>      |                             | 1.28 (0.68)<br><i>2.58</i>                                          | 1.26 (0.67)<br><i>2.54</i>                                     | p=0.60                                  |
| <b>Decision satisfaction (T<sub>0</sub>)</b>       | Not very satisfied          | 1000 (61)                                                           | 916 (58)                                                       | p=0.18                                  |
|                                                    | Very satisfied              | 651 (39)                                                            | 657 (42)                                                       |                                         |

<sup>‡</sup> Ns vary in each cell due to missing data. Percentages were calculated based on available data.

<sup>¶</sup> A substantial amount of data were missing or uninformative for education.

<sup>^</sup> Data were excluded from analysis due to limited variation.

<sup>+</sup> Log<sub>n</sub> scores in normal text and original scale scores in italics (analyses used log<sub>n</sub> scores).
