# Supplementary material for: Long-term psychosocial outcomes of low-dose CT screening: results of the UK Lung Cancer Screening randomised controlled trial
Source: PubMed Central journal article supplement (PMC5099188; doi:10.1136/thoraxjnl-2016-208283), 2016-07-28
Supplement: thoraxjnl-2016-208283supp_table2.pdf [file thoraxjnl-2016-208283supp_table2.pdf]

**Supplementary Table II. T<sub>2</sub> sample baseline characteristics by trial allocation**

|                                                    |                             | <b>Intervention<br/>(n=1553)<sup>‡</sup><br/>n (%) or mean (SD)</b> | <b>Control<br/>(n=1302)<sup>‡</sup><br/>n (%) or mean (SD)</b> | <b>Test statistic<br/>(p value)</b> |
|----------------------------------------------------|-----------------------------|---------------------------------------------------------------------|----------------------------------------------------------------|-------------------------------------|
| <b>Site</b>                                        | Liverpool                   | 735 (47)                                                            | 601 (46)                                                       | p=0.53                              |
|                                                    | Cambridge                   | 818 (53)                                                            | 701 (54)                                                       |                                     |
| <b>Age (years)</b>                                 |                             | 67.77 (3.98)                                                        | 67.82 (3.98)                                                   | p=0.77                              |
| <b>Gender</b>                                      | Male                        | 1189 (77)                                                           | 977 (75)                                                       | p=0.34                              |
|                                                    | Female                      | 364 (23)                                                            | 325 (25)                                                       |                                     |
| <b>Education<sup>¶</sup></b>                       | Up to GCSE/O level          | 509 (44)                                                            | 431 (44)                                                       | p=0.77                              |
|                                                    | Beyond GCSE/O level         | 640 (56)                                                            | 556 (56)                                                       |                                     |
| <b>Ethnicity</b>                                   | White                       | 1536 (99)                                                           | 1289 (99)                                                      | ^                                   |
|                                                    | Non-white                   | 11 (1)                                                              | 10 (1)                                                         |                                     |
| <b>Marital group</b>                               | Married /cohabiting         | 1171 (76)                                                           | 1003 (77)                                                      | p=0.37                              |
|                                                    | Not married/cohabiting      | 377 (24)                                                            | 298 (23)                                                       |                                     |
| <b>IMD</b>                                         | Quintile 1 (most deprived)  | 378 (24)                                                            | 290 (22)                                                       | p=0.63                              |
|                                                    | Quintile 2                  | 186 (12)                                                            | 152 (12)                                                       |                                     |
|                                                    | Quintile 3                  | 287 (19)                                                            | 236 (18)                                                       |                                     |
|                                                    | Quintile 4                  | 286 (18)                                                            | 259 (20)                                                       |                                     |
|                                                    | Quintile 5 (least deprived) | 416 (27)                                                            | 365 (28)                                                       |                                     |
| <b>Smoking status</b>                              | Current smoker              | 568 (37)                                                            | 441 (34)                                                       | p= 0.13                             |
|                                                    | Ex-smoker                   | 984 (63)                                                            | 861 (66)                                                       |                                     |
|                                                    | Never smoker                | 1 (<1)                                                              | 0 (0)                                                          | ^                                   |
| <b>Experience of lung cancer (T<sub>0</sub>)</b>   | No                          | 916 (59)                                                            | 767 (59)                                                       | p=0.98                              |
|                                                    | Yes                         | 634 (41)                                                            | 532 (41)                                                       |                                     |
| <b>Cancer distress (T<sub>0</sub>)<sup>+</sup></b> |                             | 2.16 (.28)<br><i>8.69</i>                                           | 2.15 (.28)<br><i>8.58</i>                                      | p=0.22                              |
| <b>Anxiety (T<sub>0</sub>)<sup>+</sup></b>         |                             | 1.52 (.71)<br><i>3.56</i>                                           | 1.50 (.71)<br><i>3.47</i>                                      | p=0.46                              |
| <b>Depression (T<sub>0</sub>)<sup>+</sup></b>      |                             | 1.26 (.67)<br><i>2.54</i>                                           | 1.25 (.66)<br><i>2.47</i>                                      | p=0.48                              |
| <b>Decision satisfaction (T<sub>0</sub>)</b>       | Not very satisfied          | 932 (60)                                                            | 736 (57)                                                       | p=0.07                              |
|                                                    | Very satisfied              | 618 (40)                                                            | 561 (43)                                                       |                                     |

<sup>‡</sup> Ns vary in each cell due to missing data. Percentages were calculated based on available data.

<sup>¶</sup> A substantial amount of data were missing or uninformative for education.

<sup>^</sup> Data were excluded from analysis due to limited variation.

<sup>+</sup> Log<sub>n</sub> scores in normal text and original scale scores in italics (analyses used log<sub>n</sub> scores).
